# Supplementary material
Source: HighWire-hosted journal article supplement (https://rmdopen.bmj.com/content/10/3/e004166)
Supplement: inline-supplementary-material-2 [file inline-supplementary-material-2.pdf]

**Supplementary Table 1:** Adjusted and unadjusted odds ratios (CI) for being in patient-reported outcome/disease activity measure remission in radiographic axSpA patients versus non-radiographic axSpA patients (reference group) at 6, 12 and 24 months after secukinumab initiation.

|                               | Months | Unadjusted               | Adjusted: Age + sex      | Adjusted: Age + sex + baseline CRP | Adjusted: Age + sex + previous b/tsDMARDs | Adjusted: Age + sex + time since diagnosis | Adjusted: Age + sex + registry | Adjusted: All*    |
|-------------------------------|--------|--------------------------|--------------------------|------------------------------------|-------------------------------------------|--------------------------------------------|--------------------------------|-------------------|
|                               |        | MODEL1                   | MODEL2                   |                                    |                                           |                                            |                                | MODEL3            |
| Pain (≤ 2)                    | 6      | <b>1.7 (1.10 ; 2.74)</b> | <b>1.7 (1.04 ; 2.63)</b> | <b>1.6 (1.02 ; 2.60)</b>           | 1.5 (0.94 ; 2.42)                         | <b>1.7 (1.04 ; 2.65)</b>                   | 1.3 (0.79 ; 2.19)              | 1.3 (0.77 ; 2.16) |
|                               | 12     | <b>2.1 (1.21 ; 3.56)</b> | <b>2.0 (1.15 ; 3.45)</b> | <b>2.0 (1.13 ; 3.42)</b>           | <b>1.8 (1.02 ; 3.16)</b>                  | <b>2.0 (1.5 ; 3.50)</b>                    | 1.5 (0.82 ; 2.76)              | 1.5 (0.82 ; 2.81) |
|                               | 24     | 1.9 (0.85 ; 4.16)        | 1.8 (0.78 ; 3.94)        | 1.8 (0.79 ; 4.05)                  | 1.3 (0.54 ; 3.04)                         | 1.9 (0.83 ; 4.29)                          | 0.8 (0.31 ; 2.16)              | 0.8 (0.30 ; 2.26) |
| Fatigue (≤ 2)                 | 6      | 1.6 (0.99 ; 2.55)        | 1.5 (0.92 ; 2.42)        | 1.4 (0.88 ; 2.33)                  | 1.4 (0.83 ; 2.22)                         | 1.5 (0.93 ; 2.48)                          | 1.0 (0.60 ; 1.75)              | 1.0 (0.58 ; 1.74) |
|                               | 12     | 1.7 (0.99 ; 3.03)        | 1.6 (0.88 ; 2.86)        | 1.5 (0.84 ; 2.75)                  | 1.4 (0.77 ; 2.55)                         | 1.7 (0.93 ; 3.04)                          | 1.0 (0.49 ; 1.87)              | 1.0 (0.49 ; 1.92) |
|                               | 24     | 2.0 (0.78 ; 5.11)        | 1.7 (0.66 ; 4.51)        | 1.7 (0.66 ; 4.52)                  | 1.1 (0.41 ; 3.24)                         | 1.9 (0.72 ; 5.10)                          | 0.6 (0.18 ; 1.89)              | 0.6 (0.17 ; 2.02) |
| PGA (≤ 2)                     | 6      | <b>1.6 (1.05 ; 2.58)</b> | 1.5 (0.95 ; 2.93)        | 1.5 (0.95 ; 2.38)                  | 1.3 (0.84 ; 2.15)                         | 1.5 (0.93 ; 2.35)                          | 1.1 (0.65 ; 1.79)              | 1.0 (0.58 ; 1.64) |
|                               | 12     | 1.6 (0.97 ; 2.75)        | 1.5 (0.90 ; 2.57)        | 1.5 (0.88 ; 2.53)                  | 1.3 (0.77 ; 2.27)                         | 1.6 (0.92 ; 2.67)                          | 0.9 (0.52 ; 1.72)              | 0.9 (0.49 ; 1.67) |
|                               | 24     | 2.1 (0.94 ; 4.60)        | 1.9 (0.86 ; 4.32)        | 1.9 (0.86 ; 4.39)                  | 1.1 (0.47 ; 2.82)                         | 2.1 (0.92 ; 4.74)                          | 0.8 (0.29 ; 2.05)              | 0.6 (0.22 ; 1.81) |
| BASDAI (≤ 2)                  | 6      | <b>1.8 (1.15 ; 2.75)</b> | <b>1.6 (1.05 ; 2.55)</b> | <b>1.6 (1.03 ; 2.52)</b>           | 1.5 (0.94 ; 2.33)                         | <b>1.6 (1.05 ; 2.57)</b>                   | 1.1 (0.69 ; 1.84)              | 1.1 (0.64 ; 1.74) |
|                               | 12     | <b>2.4 (1.37 ; 4.20)</b> | <b>2.4 (1.34 ; 4.16)</b> | <b>2.3 (1.31 ; 4.11)</b>           | <b>2.1 (1.17 ; 3.74)</b>                  | <b>2.5 (1.40 ; 4.39)</b>                   | 1.5 (0.76 ; 2.74)              | 1.5 (0.77 ; 2.75) |
|                               | 24     | <b>2.5 (1.11 ; 5.70)</b> | <b>2.4 (1.05 ; 5.53)</b> | <b>2.5 (1.08 ; 5.77)</b>           | 1.61 (0.65 ; 4.00)                        | <b>2.8 (1.18 ; 6.46)</b>                   | 1.0 (0.40 ; 2.74)              | 1.0 (0.36 ; 2.96) |
| Back pain (BASDAI Q2) (≤ 2)   | 6      | 1.4 (0.93 ; 2.15)        | 1.3 (0.87 ; 2.06)        | 1.3 (0.86 ; 2.03)                  | 1.3 (0.81 ; 1.93)                         | 1.3 (0.86 ; 2.04)                          | 0.9 (0.58 ; 1.48)              | 0.9 (0.54 ; 1.39) |
|                               | 12     | <b>1.9 (1.10 ; 3.21)</b> | <b>1.9 (1.08 ; 3.21)</b> | <b>1.8 (1.06 ; 3.18)</b>           | 1.6 (0.93 ; 2.85)                         | <b>1.9 (1.12 ; 3.34)</b>                   | 1.3 (0.71 ; 2.34)              | 1.3 (0.69 ; 2.35) |
|                               | 24     | 1.7 (0.80 ; 3.68)        | 1.7 (0.77 ; 3.64)        | 1.7 (0.79 ; 3.82)                  | 1.3 (0.56 ; 2.87)                         | 1.9 (0.84 ; 4.09)                          | 0.9 (0.36 ; 2.04)              | 0.9 (0.36 ; 2.20) |
| Joint pain (BASDAI Q3) (≤ 2)  | 6      | <b>2.2 (1.45 ; 3.21)</b> | <b>2.0 (1.31 ; 2.97)</b> | <b>1.9 (1.29 ; 2.93)</b>           | <b>1.8 (1.16 ; 2.70)</b>                  | <b>2.0 (1.32 ; 3.02)</b>                   | 1.4 (0.86 ; 2.13)              | 1.3 (0.81 ; 2.03) |
|                               | 12     | <b>1.9 (1.17 ; 3.07)</b> | <b>1.8 (1.10 ; 2.93)</b> | <b>1.8 (1.08 ; 2.91)</b>           | 1.6 (0.95 ; 2.63)                         | <b>1.8 (1.11 ; 2.97)</b>                   | 1.2 (0.68 ; 2.06)              | 1.1 (0.64 ; 1.98) |
|                               | 24     | <b>2.9 (1.35 ; 6.16)</b> | <b>2.6 (1.18 ; 5.55)</b> | <b>2.7 (1.23 ; 5.91)</b>           | 1.8 (0.79 ; 4.17)                         | <b>2.9 (1.34 ; 6.49)</b>                   | 1.1 (0.43 ; 2.70)              | 1.1 (0.43 ; 2.94) |
| Stiffness (BASDAI Q5) (≤ 2)   | 6      | <b>1.5 (1.02 ; 2.28)</b> | 1.5 (0.99 ; 2.26)        | 1.5 (0.97 ; 2.23)                  | 1.4 (0.90 ; 2.08)                         | 1.5 (0.99 ; 2.26)                          | 1.1 (0.73 ; 1.78)              | 1.1 (0.69 ; 1.70) |
|                               | 12     | 1.5 (0.91 ; 2.43)        | 1.5 (0.91 ; 2.46)        | 1.5 (0.91 ; 2.45)                  | 1.4 (0.82 ; 2.24)                         | 1.5 (0.91 ; 2.48)                          | 1.2 (0.67 ; 1.98)              | 1.1 (0.63 ; 1.90) |
|                               | 24     | 1.5 (0.70 ; 3.08)        | 1.4 (0.67 ; 3.06)        | 1.5 (0.71 ; 3.6)                   | 0.9 (0.39 ; 2.10)                         | 1.6 (0.74 ; 3.41)                          | 0.7 (0.28 ; 1.63)              | 0.6 (0.23 ; 1.59) |
| BASFI (≤ 2)                   | 6      | 1.2 (0.74 ; 1.88)        | 1.2 (0.74 ; 1.98)        | 1.2 (0.74 ; 1.96)                  | 1.1 (0.69 ; 1.86)                         | 2.0 (0.73 ; 1.96)                          | 1.1 (0.63 ; 1.80)              | 1.0 (0.59 ; 1.74) |
|                               | 12     | 1.2 (0.68 ; 2.15)        | 1.3 (0.69 ; 2.28)        | 1.2 (0.68 ; 2.26)                  | 1.2 (0.63 ; 2.12)                         | 1.2 (0.66 ; 2.21)                          | 1.3 (0.68 ; 2.50)              | 1.2 (0.63 ; 2.44) |
|                               | 24     | 1.1 (0.49 ; 2.63)        | 1.0 (0.42 ; 2.49)        | 1.1 (0.43 ; 2.60)                  | 0.8 (0.32 ; 2.05)                         | 1.2 (0.50 ; 2.87)                          | 0.7 (0.30 ; 1.95)              | 0.8 (0.30 ; 2.26) |
| ASDAS inactive disease (<1.3) | 6      | 1.5 (0.68 ; 3.15)        | 1.5 (0.68 ; 3.28)        | 1.5 (0.69 ; 3.37)                  | 1.4 (0.62 ; 3.04)                         | 1.5 (0.68 ; 3.33)                          | 1.4 (0.61 ; 3.26)              | 1.4 (0.58 ; 3.18) |
|                               | 12     | 2.3 (0.80 ; 6.61)        | 2.1 (0.73 ; 6.25)        | 2.1 (0.73 ; 6.26)                  | 1.9 (0.65 ; 5.63)                         | 2.2 (0.76 ; 6.55)                          | 1.8 (0.57 ; 5.52)              | 1.9 (0.58 ; 5.97) |
|                               | 24     | 1.6 (0.44 ; 5.60)        | 1.3 (0.36 ; 4.86)        | 1.5 (0.38 ; 5.74)                  | 0.9 (0.22 ; 3.48)                         | 1.6 (0.42 ; 5.95)                          | 0.7 (0.17 ; 2.86)              | 0.8 (0.15 ; 3.74) |

\*Values were adjusted for age, sex, registry, baseline CRP, time from diagnosis to secukinumab initiation and numbers of previous b/tsDMARDs (0/1/≥2). ASDAS, Ankylosing Spondylitis Disease Activity Score; OR, Odds Ratio; CI, confidence interval; BASDAI, Bath Ankylosing Spondylitis Disease Activity Index; BASFI, Bath Ankylosing Spondylitis Functional Index; PGA, Patient's global assessment; b/tsDMARDs, biologic/ targeted synthetic disease modifying antirheumatic drugs; axSpA, axial Spondyloarthritis. Pain, fatigue, PGA, BASDAI and BASFI were scored on a 0–10 integer scale. Significant values are indicated by bold type.

**Supplementary Table 2.** Changes in patient-reported outcomes and disease activity measures from baseline to 6, 12 and 24 months after secukinumab initiation, including adjusted and unadjusted estimated differences in radiographic versus non-radiographic axSpA patients.

|                                         | Months | Radiographic axSpA            |     | Non-radiographic axSpA        |    | Estimated difference (CI) |                            |                                    |                                                |                                            |                                |                       |
|-----------------------------------------|--------|-------------------------------|-----|-------------------------------|----|---------------------------|----------------------------|------------------------------------|------------------------------------------------|--------------------------------------------|--------------------------------|-----------------------|
|                                         |        | Median change (IQR) available | N   | Median change (IQR) available | N  | Unadjusted MODEL1         | Adjusted: Age + sex MODEL2 | Adjusted: Age + sex + baseline CRP | Adjusted: Age + sex + previous b/tsDMARD (y/n) | Adjusted: Age + sex + time since diagnosis | Adjusted: Age + sex + registry | Adjusted: All* MODEL3 |
| Δ Pain (from baseline)                  | 6      | -3 (-6;-1)                    | 486 | -2 (-5;0)                     | 82 | -0.9 (-1.4;-0.4)          | <b>-0.9 (-1.4;-0.3)</b>    | <b>-0.6 (-1.2;-0.1)</b>            | <b>-0.7 (-1.2;-0.2)</b>                        | <b>-0.8 (-1.4;-0.3)</b>                    | <b>-0.4 (-0.9;-0.1)</b>        | -0.1 (-0.7;0.5)       |
|                                         | 12     | -4 (-6;-2)                    | 323 | -3.5 (-5;-1)                  | 54 | <b>-0.7 (-1.3;-0.9)</b>   | <b>-0.7 (-1.3;-0.1)</b>    | -0.4 (-1.1;0.3)                    | -0.5 (-1.1;0.1)                                | <b>-0.7 (-1.3;-0.1)</b>                    | -0.2 (-0.8;0.5)                | 0.1 (-0.6;0.8)        |
|                                         | 24     | -4 (-6;-2)                    | 153 | -3 (-4;-1)                    | 25 | -0.8 (-1.8;0.1)           | -0.7 (-1.7;0.2)            | -0.7 (-1.7;0.3)                    | -0.2 (-1.1;0.7)                                | -0.9 (-1.8;0.1)                            | 0.4 (-0.5;1.3)                 | 0.1 (-0.9;1.1)        |
| Δ Fatigue (from baseline)               | 6      | -3 (-5;0)                     | 436 | -1.5 (-4;0)                   | 72 | <b>-1.2 (-1.8;-0.6)</b>   | <b>-1.01 (-1.6;-0.4)</b>   | <b>-0.9 (-1.6;-0.2)</b>            | <b>-0.7 (-1.3;-0.2)</b>                        | <b>-0.9 (-1.5;-0.3)</b>                    | -0.1 (-0.7;0.5)                | 0.2 (-0.5;0.9)        |
|                                         | 12     | -4 (-6;-1)                    | 290 | -3 (-5;0)                     | 44 | <b>-0.8 (-1.5;-1.0)</b>   | -0.7 (-1.4;0.01)           | -0.4 (-1.2;0.4)                    | -0.5 (-1.2;0.2)                                | <b>-0.7 (-1.4;0.02)</b>                    | 0.1 (-0.6;0.9)                 | 0.3 (-0.5;1.1)        |
|                                         | 24     | -4 (-6;-1)                    | 138 | -1.5 (-4;0)                   | 18 | <b>-0.7 (-1.8;-0.5)</b>   | -0.4 (-1.5;0.8)            | -0.3 (-1.6;1.0)                    | 0.3 (-0.8;1.5)                                 | -0.6 (-1.7;0.6)                            | 1.3 (-0.2;2.4)                 | 1.0 (-0.2;2.3)        |
| Δ PGA (from baseline)                   | 6      | -3 (-5;-1)                    | 487 | -2 (-4;0)                     | 83 | <b>-0.9 (-1.4;-0.4)</b>   | <b>-0.7 (-1.2;-0.2)</b>    | -0.6 (-1.2;0.0)                    | -0.5 (-1;0.1)                                  | <b>-0.7 (-1.2;-0.2)</b>                    | -0.1 (-0.6;0.4)                | 0.2 (-0.4;0.8)        |
|                                         | 12     | -4 (-6;-2)                    | 324 | -3 (-5;-1)                    | 53 | <b>-0.8 (-1.4;-0.2)</b>   | <b>-0.7 (-1.3;-0.1)</b>    | -0.3 (1.0;0.4)                     | -0.4 (-1.0;0.2)                                | <b>-0.7 (-1.3;-0.1)</b>                    | -0.2 (-0.8;0.4)                | 0.3 (-0.4;0.9)        |
|                                         | 24     | -4 (-7;-1)                    | 154 | -2 (-5.2;-1)                  | 24 | <b>-1.3 (-2.2;-0.3)</b>   | <b>-1.2 (-2.2;-0.3)</b>    | -1.1 (-2.1;0.0)                    | -0.4 (-1.4;0.5)                                | <b>-1.4 (-2.4;-0.4)</b>                    | -0.1 (-1.0;0.9)                | -0.1 (-1.1;1.0)       |
| Δ BASDAI (from baseline)                | 6      | -3.1 (-4.9;-0.9)              | 525 | -1.7 (-4.1;-0.5)              | 91 | <b>-0.9 (-1.3;-0.4)</b>   | <b>-0.7 (-1.2;-0.3)</b>    | <b>-0.6 (-1.1;-0.1)</b>            | <b>-0.5 (-1.0;-0.1)</b>                        | <b>-0.7 (-1.1;-0.2)</b>                    | -0.1 (-0.5;0.3)                | 0.2 (-0.4;0.7)        |
|                                         | 12     | -3.7 (-5.4;-1.6)              | 346 | -2.4 (-4.1;-1.2)              | 57 | <b>-0.8 (-1.4;-0.3)</b>   | <b>-0.8 (-1.3;-0.2)</b>    | -0.5 (-1.1;0.1)                    | -0.5 (-1.0;0.0)                                | <b>-0.8 (-1.3;-0.2)</b>                    | -0.1 (-0.7;0.4)                | 0.1 (-0.5;0.6)        |
|                                         | 24     | -3.7 (-5.5;-1.5)              | 170 | -2.6 (-4.5;-1.3)              | 25 | -0.6 (-1.5;0.2)           | -0.5 (-1.4;0.4)            | -0.3 (-1.2;0.6)                    | -0.2 (-0.7;1.0)                                | <b>-0.7 (-1.5;0.2)</b>                     | 0.6 (-0.2;1.4)                 | 0.6 (-0.3;1.5)        |
| Δ Back pain (BASDAI 2) (from baseline)  | 6      | -3 (-6;-1)                    | 525 | -2 (-4;0)                     | 91 | <b>-0.9 (-1.4;-0.4)</b>   | <b>-0.8 (-1.3;-0.2)</b>    | -0.5 (-1.1;0.1)                    | <b>-0.6 (-1.1;-0.1)</b>                        | <b>-0.7 (-1.3;-0.2)</b>                    | <b>-0.2 (-0.7;0.3)</b>         | 0.2 (-0.4;0.8)        |
|                                         | 12     | -4 (-6;-1)                    | 346 | -2 (-4;-1)                    | 57 | <b>-1.0 (-1.6;-0.3)</b>   | <b>-0.9 (-1.6;-0.3)</b>    | -0.6 (-1.2;0.1)                    | <b>-0.6 (-1.3;-0.04)</b>                       | <b>-0.9 (-1.5;-0.3)</b>                    | -0.3 (-0.9;0.4)                | 0.1 (-0.6;0.8)        |
|                                         | 24     | -4 (-6;-1)                    | 170 | -3 (-4;-1)                    | 25 | -0.7 (-1.7;0.3)           | -0.6 (-1.6;0.4)            | -0.3 (-1.4;0.8)                    | -0.1 (-0.9;1.1)                                | <b>-0.8 (-1.8;-0.2)</b>                    | 0.6 (-0.3;1.6)                 | 0.6 (-0.5;1.6)        |
| Δ Joint pain (BASDAI 3) (from baseline) | 6      | -2 (-5;0)                     | 525 | -1 (-4;0)                     | 91 | <b>-1.0 (-1.5;-0.5)</b>   | <b>-0.8 (-1.3;-0.3)</b>    | <b>-0.7 (-1.3;-0.1)</b>            | <b>-0.6 (-1.1;-0.1)</b>                        | <b>-0.8 (-1.3;-0.2)</b>                    | -0.2 (-0.7;0.3)                | 0.0 (-0.6;0.6)        |
|                                         | 12     | -3 (-5;0)                     | 346 | -3 (-4;-1)                    | 57 | -0.6 (-1.2;0.0)           | -0.5 (-1.1;0.1)            | -0.3 (-0.9;0.4)                    | -0.3 (-0.9;0.4)                                | <b>-0.6 (-1.2;0.1)</b>                     | 0.1 (-0.5;0.7)                 | -0.2 (-0.5;0.8)       |
|                                         | 24     | -3 (-5;0)                     | 170 | -3 (-6;0)                     | 25 | -1.2 (-2.1;0.2)           | <b>-1.0 (-2.0;-0.1)</b>    | -0.8 (-1.8;0.2)                    | -0.3 (-1.2;0.6)                                | <b>-1.2 (-2.2;-0.2)</b>                    | 0.3 (-0.6;1.1)                 | -0.3 (-0.7;1.3)       |
| Δ Stiffness (BASDAI 5) (from baseline)  | 6      | -3 (-6;-1)                    | 525 | -2 (-4.5;-1)                  | 91 | <b>-0.6 (-1.1;-0.1)</b>   | <b>-0.5 (-1.1;-0.01)</b>   | -0.6 (-1.2;0.0)                    | <b>-0.4 (-0.9;0.1)</b>                         | <b>-0.4 (-0.9;0.1)</b>                     | -0.02 (-0.6;0.5)               | -0.1 (-0.5;0.7)       |
|                                         | 12     | -4 (-7;-2)                    | 346 | -3 (-5;-1)                    | 57 | <b>-0.7 (-1.3;-0.03)</b>  | <b>-0.7 (-1.3;-0.05)</b>   | -0.4 (-1.1;0.3)                    | <b>-0.5 (-1.1;0.1)</b>                         | <b>-0.7 (-1.3;-0.02)</b>                   | -0.2 (-0.9;0.4)                | 0.1 (-0.6;0.8)        |
|                                         | 24     | -4 (-6;-2)                    | 170 | -4 (-6;-2)                    | 25 | -0.2 (-1.1;0.8)           | -0.1 (-1.1;0.8)            | 0.1 (-1.0;1.1)                     | 0.5 (-0.4;1.5)                                 | -0.3 (-1.3;0.7)                            | 0.9 (-0.1;1.8)                 | 0.8 (-0.2;1.9)        |
| Δ BASFI (from baseline)                 | 6      | -1.4 (-3.1;-0.1)              | 342 | -0.9 (-2.2;0)                 | 75 | -0.4 (-0.9;0.2)           | -0.4 (-0.9;0.2)            | -0.4 (-1.0;0.3)                    | -0.3 (-0.8;0.3)                                | <b>-0.3 (-0.9;0.3)</b>                     | -0.3 (-0.8;0.3)                | 0.0 (-0.7;0.7)        |
|                                         | 12     | -1.7 (-3.5;-0.3)              | 211 | -1.3 (-2.5;-0.2)              | 47 | 0.2 (-0.4;0.9)            | 0.2 (-0.5;0.9)             | 0.4 (-0.3;1.2)                     | 0.4 (-0.3;1.0)                                 | 0.2 (-0.4;0.9)                             | 0.1 (-0.6;0.8)                 | 0.4 (-0.3;1.2)        |
|                                         | 24     | -2 (-4.1;-0.5)                | 104 | -1.1 (-4;-0.4)                | 22 | 0.4 (-0.7;1.4)            | 0.6 (-0.4;1.7)             | 0.6 (-0.5;1.7)                     | 1.0 (0.0;2.0)                                  | 0.3 (-0.8;1.3)                             | 0.9 (-0.1;2.1)                 | 0.8 (-0.3;2.0)        |
| Δ ASDAS (from baseline)                 | 6      | -1.5 (-2.5;-0.6)              | 454 | -1 (-1.9;-0.2)                | 73 | -0.1 (-0.3;0.1)           | -0.7 (-0.3;0.2)            | -0.1 (-0.3;0.2)                    | 0.03 (-0.2;0.2)                                | -0.5 (-0.3;0.2)                            | 0.1 (-0.2;0.3)                 | 0.1 (-0.1;0.4)        |
|                                         | 12     | -1.9 (-2.8;-1)                | 305 | -1.2 (-2.3;-0.6)              | 49 | -0.2 (-0.4;0.1)           | -0.2 (-0.4;0.1)            | -0.1 (-0.4;0.2)                    | -0.1 (-0.3;0.2)                                | -0.2 (-0.4;0.1)                            | -0.02 (-0.3;0.2)               | 0.1 (-0.2;0.3)        |
|                                         | 24     | -2 (-2.7;-1)                  | 153 | -1.4 (-3;-0.6)                | 19 | -0.2 (-0.6;0.2)           | -0.2 (-0.6;0.3)            | -0.02 (-0.5;0.4)                   | 0.2 (-0.3;0.6)                                 | -0.3 (-0.7;0.2)                            | 0.2 (-0.2;0.6)                 | 0.3 (-0.2;0.7)        |

\*Values were adjusted for age, sex, registry, baseline CRP, time from diagnosis to secukinumab initiation and numbers of previous b/tsDMARDs (0/1/≥2). BASDAI, Bath Ankylosing Spondylitis Disease Activity Index; BASFI, Bath Ankylosing Spondylitis Functional Index; ASDAS, Ankylosing Spondylitis Disease Activity Score; axSpA, axial Spondyloarthritis; b/tsDMARDs, biologic/ targeted synthetic disease modifying antirheumatic drugs; CI, confidence interval. IQR, Interquartile Range; PGA, Patient's global assessment. Pain, fatigue, PGA, BASDAI and BASFI were scored on a 0–10 integer scale. Significant values are indicated by bold type.

**Supplementary Table 3.** Different adjusted models presenting odds ratios (CI) for being in patient-reported outcome/disease activity measure remission in radiographic axSpA patients versus non-radiographic axSpA patients (reference group) at 6, 12 and 24 months after secukinumab initiation.

| PRO remission   | Months | MODEL 3                                                                                                                                    | Sensitivity model 1                                                                                                                                               | Sensitivity model 2                                                                                                                                               |
|-----------------|--------|--------------------------------------------------------------------------------------------------------------------------------------------|-------------------------------------------------------------------------------------------------------------------------------------------------------------------|-------------------------------------------------------------------------------------------------------------------------------------------------------------------|
|                 |        | Adjustment for age, sex, registry, baseline CRP, time from diagnosis to secukinumab initiation and numbers of previous b/tsDMARDs (0/1/≥2) | Adjustment for age, sex, registry, baseline CRP, time from diagnosis to secukinumab initiation and numbers of previous b/tsDMARDs (0/1/≥2)<br>+<br>Smoking status | Adjustment for age, sex, registry, baseline CRP, time from diagnosis to secukinumab initiation and numbers of previous b/tsDMARDs (0/1/≥2)<br>+<br>HLA-B27 status |
| Pain (≤2)       | 6      | 1.3 (0.8 ; 2.2)                                                                                                                            | 1.3 (0.7 ; 2.1)                                                                                                                                                   | 1.5 (0.9 ; 2.6)                                                                                                                                                   |
|                 | 12     | 1.5 (0.8 ; 2.8)                                                                                                                            | 1.6 (0.8 ; 2.9)                                                                                                                                                   | 1.6 (0.8 ; 3.1)                                                                                                                                                   |
|                 | 24     | 0.8 (0.3 ; 2.3)                                                                                                                            | 0.8 (0.3 ; 2.3)                                                                                                                                                   | 0.8 (0.3 ; 2.5)                                                                                                                                                   |
| Fatigue (≤2)    | 6      | 1.0 (0.6 ; 1.7)                                                                                                                            | 1.0 (0.6 ; 1.7)                                                                                                                                                   | 1.2 (0.7 ; 2.2)                                                                                                                                                   |
|                 | 12     | 1.0 (0.5 ; 1.9)                                                                                                                            | 1.0 (0.5 ; 1.9)                                                                                                                                                   | 1.1 (0.5 ; 2.2)                                                                                                                                                   |
|                 | 24     | 0.6 (0.2 ; 2.0)                                                                                                                            | 0.8 (0.2 ; 2.9)                                                                                                                                                   | 0.6 (0.1 ; 2.3)                                                                                                                                                   |
| PGA (≤2)        | 6      | 1.0 (0.6 ; 1.6)                                                                                                                            | 0.9 (0.5 ; 1.6)                                                                                                                                                   | 1.1 (0.6 ; 1.9)                                                                                                                                                   |
|                 | 12     | 0.9 (0.5 ; 1.7)                                                                                                                            | 0.9 (0.5 ; 1.6)                                                                                                                                                   | 0.9 (0.5 ; 1.8)                                                                                                                                                   |
|                 | 24     | 0.6 (0.2 ; 1.8)                                                                                                                            | 0.7 (0.2 ; 2.3)                                                                                                                                                   | 0.6 (0.2 ; 1.9)                                                                                                                                                   |
| BASDAI (≤2)     | 6      | 1.1 (0.6 ; 1.7)                                                                                                                            | 1.1 (0.6 ; 1.7)                                                                                                                                                   | 1.2 (0.7 ; 2.0)                                                                                                                                                   |
|                 | 12     | 1.5 (0.8 ; 2.8)                                                                                                                            | 1.4 (0.8 ; 2.7)                                                                                                                                                   | 1.5 (0.8 ; 3.0)                                                                                                                                                   |
|                 | 24     | 1.0 (0.4 ; 3.0)                                                                                                                            | 1.1 (0.4 ; 3.4)                                                                                                                                                   | 0.9 (0.3 ; 2.9)                                                                                                                                                   |
| BASFI (≤2)      | 6      | 1.0 (0.6 ; 1.7)                                                                                                                            | 1.0 (0.6 ; 1.7)                                                                                                                                                   | 1.0 (0.6 ; 1.7)                                                                                                                                                   |
|                 | 12     | 1.2 (0.6 ; 2.4)                                                                                                                            | 1.3 (0.6 ; 2.6)                                                                                                                                                   | 1.2 (0.6 ; 2.5)                                                                                                                                                   |
|                 | 24     | 0.8 (0.3 ; 2.3)                                                                                                                            | 0.8 (0.3 ; 2.3)                                                                                                                                                   | 0.7 (0.2 ; 2.1)                                                                                                                                                   |
| ASDAS ID (<1.3) | 6      | 1.4 (0.6 ; 3.2)                                                                                                                            | 1.3 (0.6 ; 3.1)                                                                                                                                                   | 1.3 (0.5 ; 3.0)                                                                                                                                                   |
|                 | 12     | 1.9 (0.6 ; 5.9)                                                                                                                            | 1.8 (0.6 ; 5.9)                                                                                                                                                   | 2.2 (0.6 ; 8.3)                                                                                                                                                   |
|                 | 24     | 0.8 (0.2 ; 3.7)                                                                                                                            | 1.0 (0.2 ; 5.4)                                                                                                                                                   | 0.8 (0.1 ; 6.5)                                                                                                                                                   |

ASDAS ID, Ankylosing Spondylitis Disease Activity Score inactive disease; CI, confidence interval; BASDAI, Bath Ankylosing Spondylitis Disease Activity Index; BASFI, Bath Ankylosing Spondylitis Functional Index; PGA, Patient's global assessment; b/tsDMARDs, biologic/ targeted synthetic disease modifying antirheumatic drugs; axSpA, axial Spondyloarthritis. Pain, fatigue, PGA, BASDAI and BASFI were scored on a 0–10 integer scale. Significant values are indicated by bold type.
